# Supplementary material for: Global Trends and Frontiers of Age-Related Macular Degeneration From 2002 to 2021: A bibliometric analysis
Source: Research Square preprint supplement (doi:10.21203/rs.3.rs-2738381/v1), 2023-03-29
Supplement: Supplementary file 2 [file 2aafd3345f962a9819e9f8b0.docx]

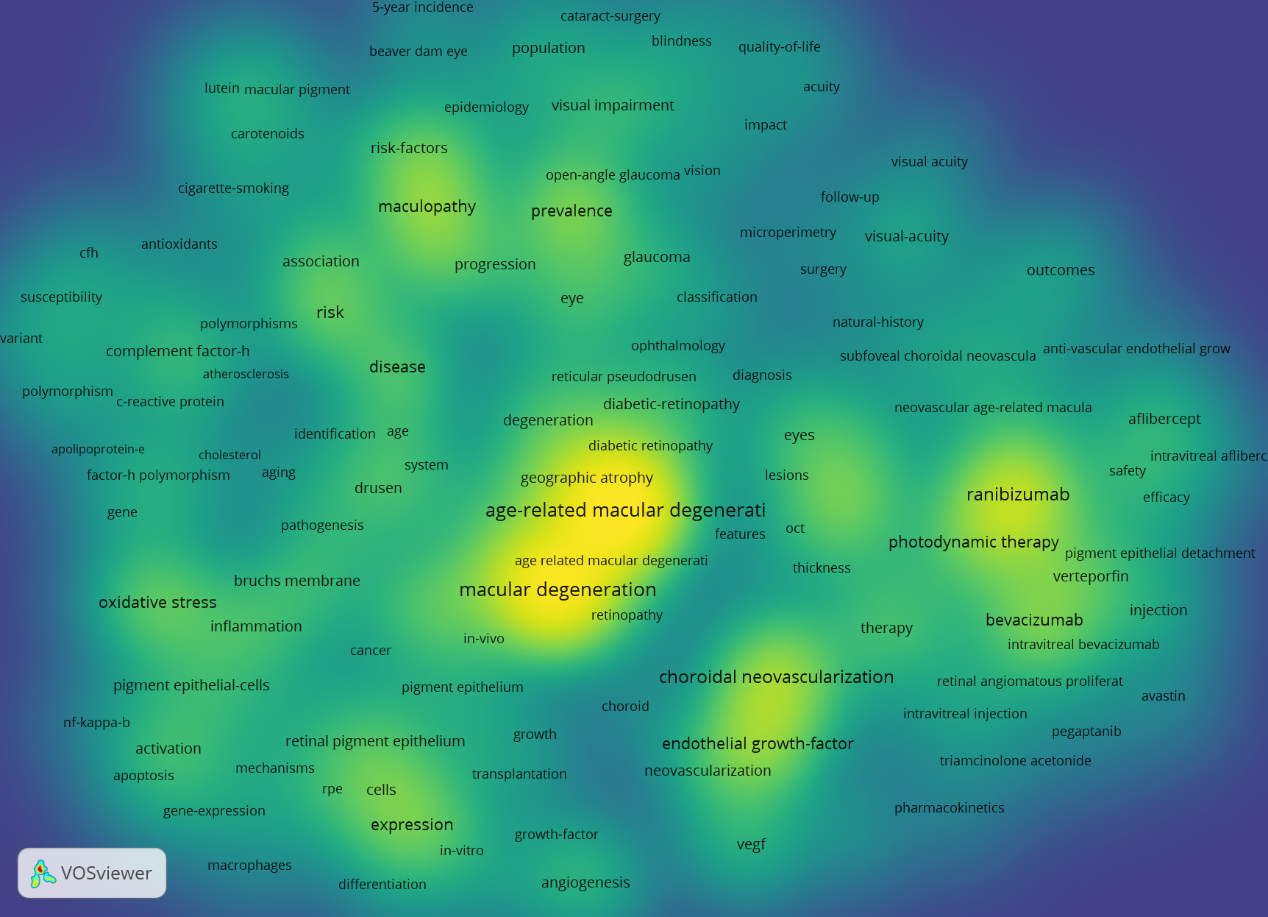


**Supplementary Figure 2** | Density visualization for keywords in the co-occurrence network map. Each keyword in the density visualization has colors that indicate its appearance.

frequency. Keywords in yellow emerge more frequently, while green emerge in blue less frequently.
