# Supplementary material for: Global Trends and Frontiers of Age-Related Macular Degeneration From 2002 to 2021: A bibliometric analysis
Source: Research Square preprint supplement (doi:10.21203/rs.3.rs-2738381/v1), 2023-03-29
Supplement: Supplementary file 3 [file 71447d7df53e6a561bca77e6.docx]

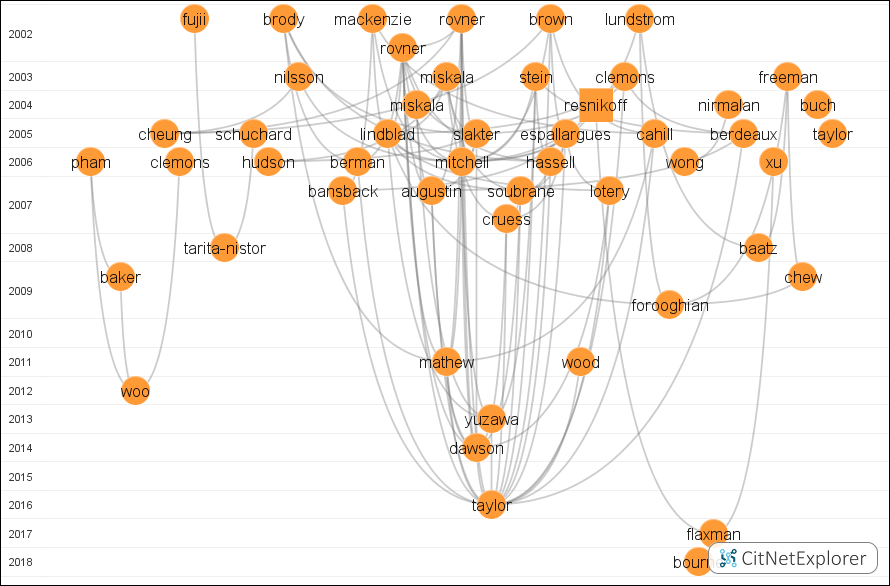


Supplementary Figure 6 | Cluster 4 represents the prevalence of AMD. The vertical axis coordinates indicate the year of publication. Each point/square indicates a publication with the first author's last name. Squares represent the publications with the highest citation scores.
