# Supplementary material for: Global Trends and Frontiers of Age-Related Macular Degeneration From 2002 to 2021: A bibliometric analysis
Source: Research Square preprint supplement (doi:10.21203/rs.3.rs-2738381/v1), 2023-03-29
Supplement: Supplementary file 4 [file 756e2a1bacb3c29ec819db2e.docx]

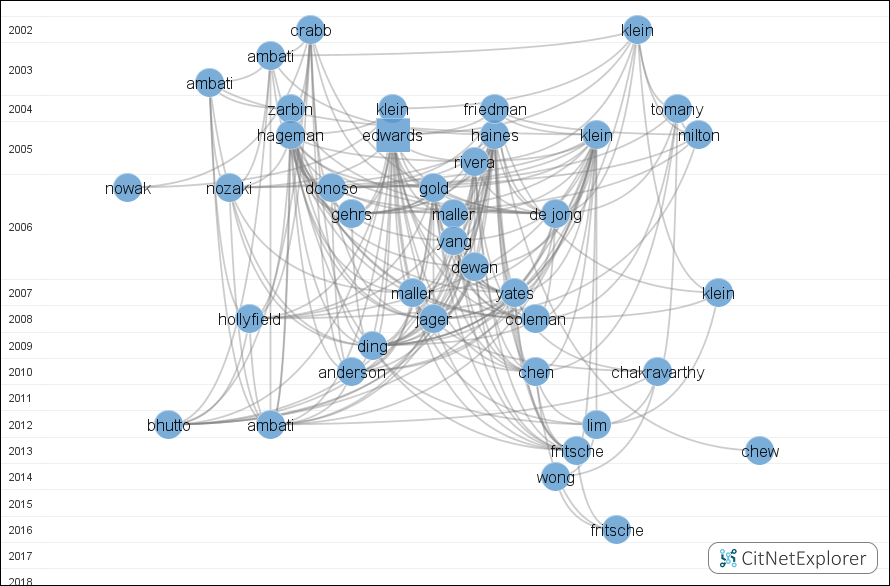


Supplementary Figure 3 | Cluster 1 represents the mechanism of AMD. The vertical axis coordinates indicate the year of publication. Each point/square indicates a publication with the first author's last name. Squares represent the publications with the highest citation scores.
