# Supplementary material for: Global Trends and Frontiers of Age-Related Macular Degeneration From 2002 to 2021: A bibliometric analysis
Source: Research Square preprint supplement (doi:10.21203/rs.3.rs-2738381/v1), 2023-03-29
Supplement: Supplementary file 5 [file 953d77deabd7bb8bfbc8e0ba.docx]

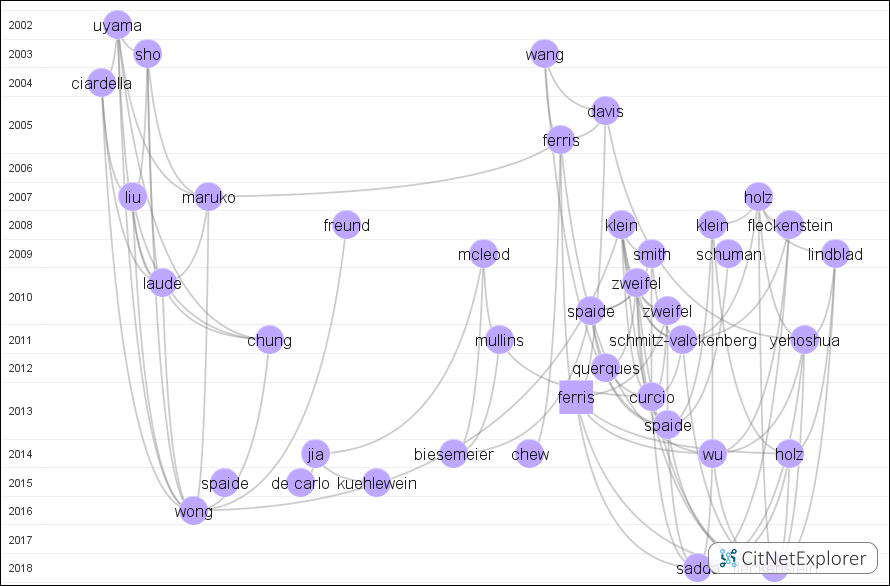


Supplementary Figure 5 | Cluster 3 represents the feature and classification of AMD. The vertical axis coordinates indicate the year of publication. Each point/square indicates a publication with the first author's last name. Squares represent the publications with the highest citation scores.
